# Supplementary material for: Immune Factors Drive Expression of SARS-CoV-2 Receptor Genes Amid Sexual Disparity
Source: MDPI journal article supplement (doi:10.3390/v15030657), 2023-02-28
Supplement: s1 [file s1]

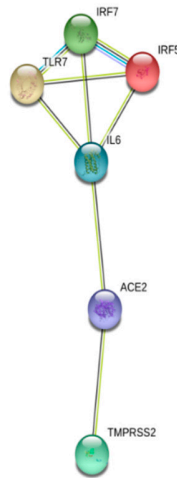

**Figure S1.** String analysis showing possible gene interactions within the pathogenesis of SARS-CoV-2. *TLR7* is the crucial marker in the triggering of immune response which could be activated by IRF genes. This activation could lead to the over-expression of *ACE2* and *TMPRSS2* which are necessary for the entry of SARS-CoV-2 during infection.

**Table S1.** String analysis parameters show the statistical values of the interactions between the target proteins. The number of edges is more than the expected number; this indicated that the proteins exhibited a higher degree of interactions with each other than what could be anticipated for a randomly selected set of proteins with a similar size and degree distribution from the genome.

| Parameters                        | Values                |
|-----------------------------------|-----------------------|
| the number of nodes               | 6                     |
| the number of edges               | 8                     |
| average node degree               | 2.67                  |
| avg. local clustering coefficient | 0.75                  |
| expected number of edges          | 1                     |
| PPI enrichment <i>p</i> -value    | $3.54 \times 10^{-6}$ |

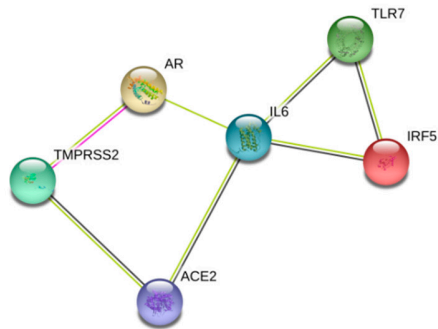

**Figure S2.** String analysis showing the association of male sex hormone receptors with SARS-CoV-2 receptor genes. In recent literature, AR has been suggested to regulate the expression of ACE2. The STRING analysis result showed that this AR-driven regulation of ACE2 could be regulated by cytokines.

**Table S2.** String analysis parameters show the statistical values of the interactions between the male sex hormone receptor and immune target proteins. The resulting number of edges was higher than expected.

| Parameters                        | Values  |
|-----------------------------------|---------|
| the number of nodes               | 6       |
| the number of edges               | 7       |
| average node degree               | 2.33    |
| avg. local clustering coefficient | 0.361   |
| expected number of edges          | 1       |
| PPI enrichment <i>p</i> -value    | 0.00022 |
